# Supplementary material for: Perturbation-response analysis of in silico metabolic dynamics revealed hard-coded responsiveness in the cofactors and network sparsity
Source: eLife. 2025 May 20;13:RP98800. doi: 10.7554/eLife.98800 (PMC12091999; doi:10.7554/eLife.98800)
Supplement: Supplementary file 1. [file elife-98800-supp1.xlsx]

## Sheet: 1a
Reaction ID	Metabolites ID	Type of regulation
ACALD	amp	inhibition
FBA	dhap,adp,amp,pep,pi	inhibition
FUM	cit	inhibition
G6PDH2r	nadh,nadph	inhibition
GLUN	adp,atp,glu_L,nad,nadh,nadp,nadph,pi	inhibition
GLUSy	glu_L	inhibition
GND	atp,fdp,nadp,ru5p_D	inhibition
ICDHyr	glx,oaa,pep	inhibition
ICL	akg,icit,prp,succ	inhibition
LDH	atp	inhibition
PGI	6pgc,pep	inhibition
PPC	mal_L	inhibition
PPCK	atp,pep	inhibition
PPS	adp,akg,amp,oaa,pep	inhibition
PTAr	adp,atp,nadh,nadph,pep,pyr	inhibition
PYKF	atp,succoa	inhibition
RPI	amp	inhibition
TALA	pi	inhibition
PYKA	atp,succoa	inhibition
EDA	6pgc,g3p	inhibition
PGMT	accoa	inhibition
GLGC	amp	inhibition

## Sheet: 1b
Reaction ID	Metabolites ID	Type of regulation
PFK	ADP,FBP	activation
PTACK	PYR,PEP	activation
FK	PEP	inhibition
PYK	ATP,PYR	inhibition
CSICD	AKG,NADH	inhibition
PTACK	ATP	inhibition
PPC	FUM	inhibition
PFL	AcCoA,PYR	inhibition
ADH	ACTLD,NAD	inhibition
MDH	OAA,NAD,NADH,FUM	inhibition
FRD	OAA	inhibition
ALDH	CoA	inhibition

## Sheet: 1c
Reaction ID	Metabolites ID	Type of regulation
PTS	G6P	inhibition
PGDH	atp	inhibition
PGL	6pg	inhibition
G1PAT	fdp	activation
PFK	pep	inhibition
PFK	adp	activation
PEPCxylase	fdp	activation
PK	fdp	activation
PK	atp	inhibition

## Sheet: 1d
Reaction ID	Substrates	Products	BiGG Model ID
CITL	cit_c	ac_c, oaa_c	iYS1720
NADPHQR2	nadph_c, q8_c	nadp_c, q8h2_c	iYS1720
OAADC	oaa_c	pyr_c	iYS1720
POX	pyr_c, q8_c	ac_c, q8h2_c	iYS1720
ALDD2y	acald_c, nadp_c	ac_c, nadph_c	iYS1720
FDH	for_c, nad_c	nadh_c	iYO844
ACONT	cit_c	icit_c	iYO844
ALCD2y	etoh_c, nadp_c	acald_c, nadph_c	iYO844
GAPDi_nadp	13dpg_c, nadph_c	g3p_c, nadp_c	iYO844
ALDD2x	acald_c, nad_c	ac_c, nadh_c	iYO844
ACYP_2	actp_c	ac_c	iSB619
FRDx	fum_c, nadh_c	nad_c, succ_c	iNF517
ICDHxm	icit_c, nad_c	akg_c, nadh_c	iMM904
PYRDC	pyr_c	acald_c	iMM904
ACYP	13dpg_c	3pg_c	iMM1415
ADPGLC	adpglc_c	amp_c, g1p_c	iMM1415
ETOHMO	etoh_c, nadph_c	acald_c, nadp_c	iMM1415
PKETF	f6p_c	actp_c, e4p_c	iLB1027_lipid
G6PDH1	g6p_c, nad_c	6pgl_c, nadh_c	iIT341
ASCTmr	accoa_c, succ_c	ac_c, succoa_c	iIS312
PGAM1_PhosHydro	pep_c	pyr_c	iCHOv1
PFK_adp	adp_c, f6p_c	amp_c, fdp_c	iAF692
